# Supplementary material
Source: PubMed Central journal article supplement (PMC3622186)
Supplement: NIHMS448933-supplement-1.pdf [file NIHMS448933-supplement-1.pdf]

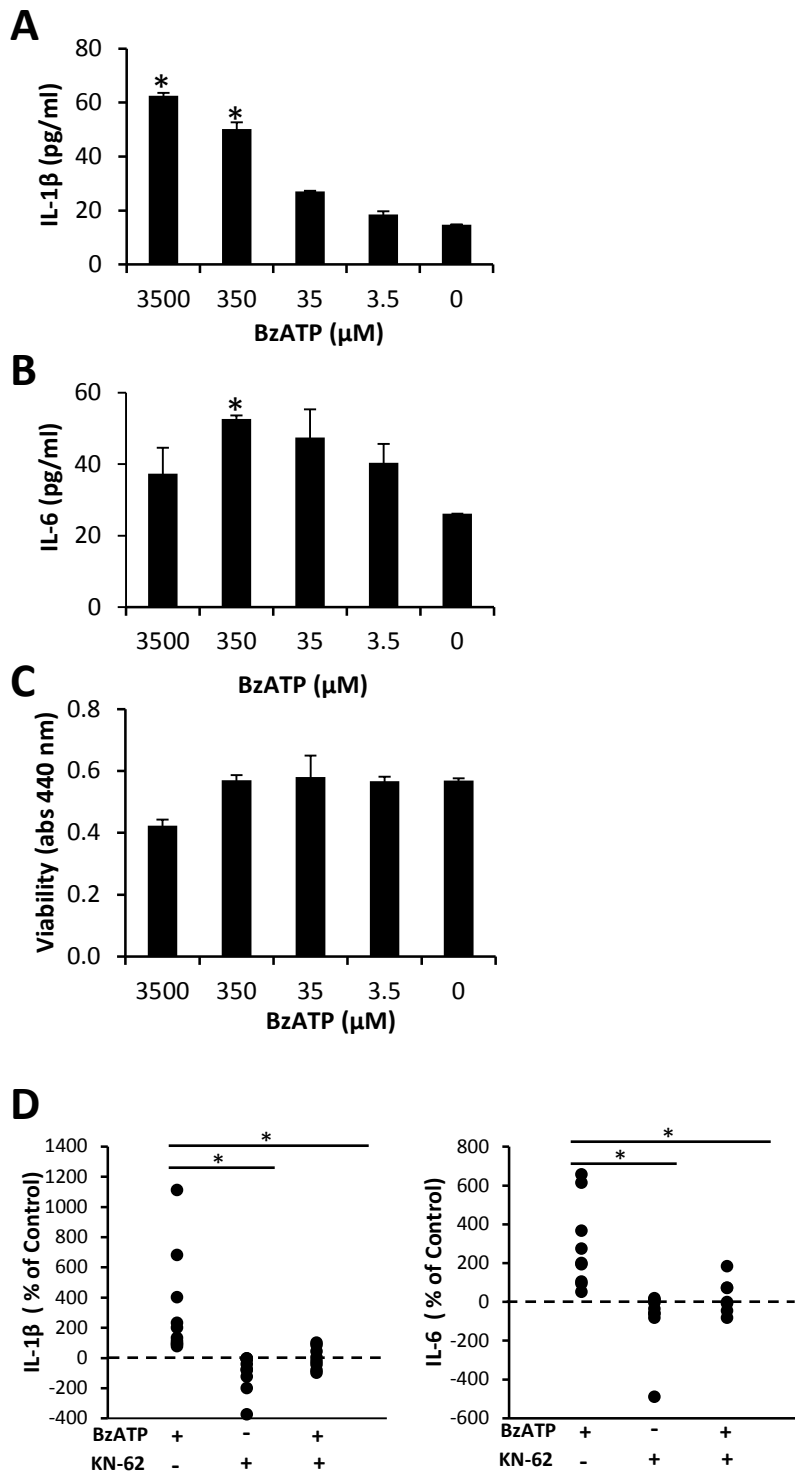

**Supplemental Figure 1.** SmiDC response following increasing doses of BzATP. SmiDCs were cultured for 24 h in the presence of increasing doses of BzATP then (A) IL-1 $\beta$ , (B) IL-6, and (C) smiDC viability were examined by ELISA and mitochondrial dehydrogenase activity, respectively. Data are expressed as the mean  $\pm$  SD of replicates. Representative of three independent experiments. \* indicates a significant difference compared to non-treated controls,  $p < 0.05$ . (D) The percent increase in IL-1 $\beta$  and IL-6 normalized to PBS treated controls (dashed line at 0). Each dot represents an individual experiment. \* indicates a significant difference between the indicated groups,  $p < 0.05$ .

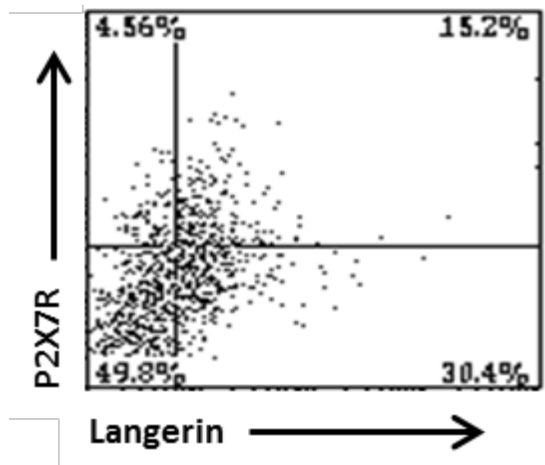

**Supplemental Figure 2.** SmiDCs express P2X7R. SmiDCs were stained with HLA-DR-, Langerin-, and P2X7R-Abs and first gated on live cells in the FSC vs SSC then on HLA-DR<sup>+</sup> cells. Numbers represent the percent positive within the respective quadrant.

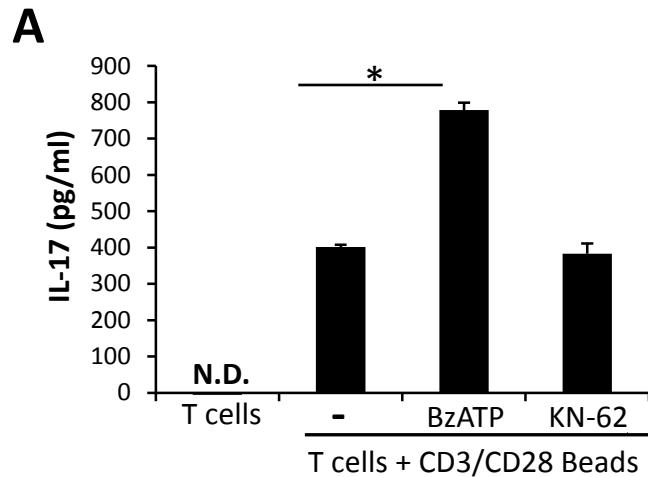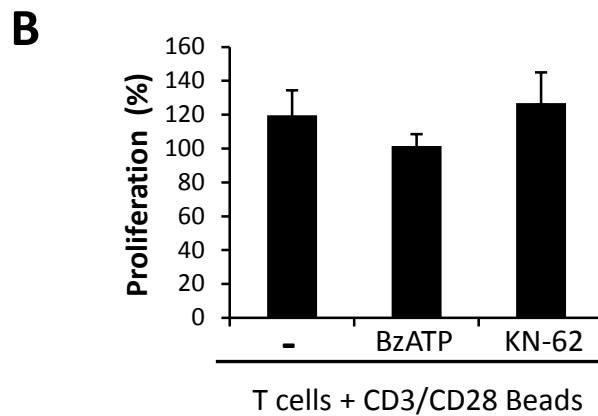

**Supplemental Figure 3.** IL-17 secretion is significantly increased by naïve T cells stimulated by CD3/CD28 beads in the presence of BzATP. Naïve T cells were stimulated with CD3/CD28 beads for 72 h in the presence of BzATP, KN-62, or vehicle control (-). T cells alone are negative controls. (A) IL-17 secretion and (B) percent increase in T cell proliferation compared to T cells alone were determined by ELISA and mitochondrial dehydrogenase activity, respectively. Bars represent the means  $\pm$  SD from triplicates. \* indicates a significant difference,  $p < 0.05$ , compared to vehicle control. N.D.=non-detected. Representative of three independent experiments.

**Supplemental Table I. IL-17 concentrations**

|        | <b>T cells</b>    | <b>DC + T cells</b>     | <b>BzATP</b>                   | <b>KN-62</b>                   | <b>BzATP + KN-62</b> |
|--------|-------------------|-------------------------|--------------------------------|--------------------------------|----------------------|
| Exp 1  | N.D. <sup>a</sup> | 63.9 ± 9.7 <sup>b</sup> | <b>101.4 ± 1.3<sup>c</sup></b> | <u>17.5 ± 2.8</u>              |                      |
| Exp 2  | 9.7 ± 0.8         | 720.0 ± 64.5            | 565 ± 17.5                     | <u>202.7 ± 6.2<sup>d</sup></u> |                      |
| Exp 3  | 62.6 ± 7.3        | 248.5 ± 18.0            | 112.7 ± 7.2                    | <u>112.5 ± 11.3</u>            |                      |
| Exp 4  | 13.4 ± 0.5        | 66.7 ± 1.0              | 23.4 ± 1.1                     | <u>14.8 ± 2.0</u>              |                      |
| Exp 5  | 2.8 ± 1.8         | 1494 ± 0.9              | <b>1857 ± 153.7</b>            | e                              |                      |
| Exp 6  | N.D.              | 585.3 ± 54.9            | <b>639 ± 14.6</b>              |                                |                      |
| Exp 7  | N.D.              | 19.03 ± 0.8             | N.D.                           | <u>11.4 ± 0.5</u>              |                      |
| Exp 8  | N.D.              | 15.3 ± 2.3              | <b>39.773 ± 3.1</b>            | 18.08 ± 2.2                    |                      |
| Exp 9  | 23.9 ± 5.1        | 277.0 ± 3.5             | <b>489.2 ± 11.7</b>            | 327.0 ± 9.0                    | 315.5 ± 8.4          |
| Exp 10 | 30.1 ± 8.9        | 698.1 ± 15.6            | <b>1306.2 ± 37.9</b>           | <u>431.7 ± 18.4</u>            | 800.0 ± 56.0         |
| Exp 11 | 1.5 ± 0.94        | 3.8 ± 1.5               | <b>19.7 ± 4.0</b>              | <u>1.9 ± 1.2</u>               | 13.9 ± 2.8           |

<sup>a</sup> N.D.= non-detected

<sup>b</sup> 5-day MLC. Supernatants assessed by IL-17-specific ELISA. Mean of replicates ± 1 S.D.

<sup>c</sup> Bold values highlight an increase in IL-17 following BzATP treatment

<sup>d</sup> Underlined values highlight a decrease in IL-17 following KN-62 treatment

<sup>e</sup> Empty well indicates treatment was not performed.
